# Supplementary material for: Microtubule inhibitor, SP-6-27 inhibits angiogenesis and induces apoptosis in ovarian cancer cells
Source: PubMed Central journal article supplement (PMC5620153; doi:10.18632/oncotarget.17549), 2017-05-02
Supplement: oncotarget-08-67017-s001.pdf [file oncotarget-08-67017-s001.pdf]

## Microtubule inhibitor, SP-6-27 inhibits angiogenesis and induces apoptosis in ovarian cancer cells

### SUPPLEMENTARY MATERIALS

| 4-H chromene | Structure                                                                           | IC <sub>50</sub> (mean) |
|--------------|-------------------------------------------------------------------------------------|-------------------------|
| SP-6-Ch 1    | 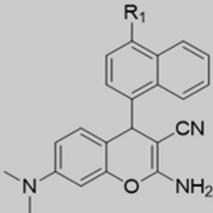   | 5.3 μM                  |
| SP-6-Ch 2    |    | >10 μM                  |
| SP-6-27      |   | 0.2 μM                  |
| SP-6-Ch 3    |  | >10 μM                  |
| SP-6-Ch 4    |  | >10 μM                  |

Supplementary Figure 1: IC<sub>50</sub> of the tested chromene analogs as determined at 72 h exposure by Alamar Blue assay.

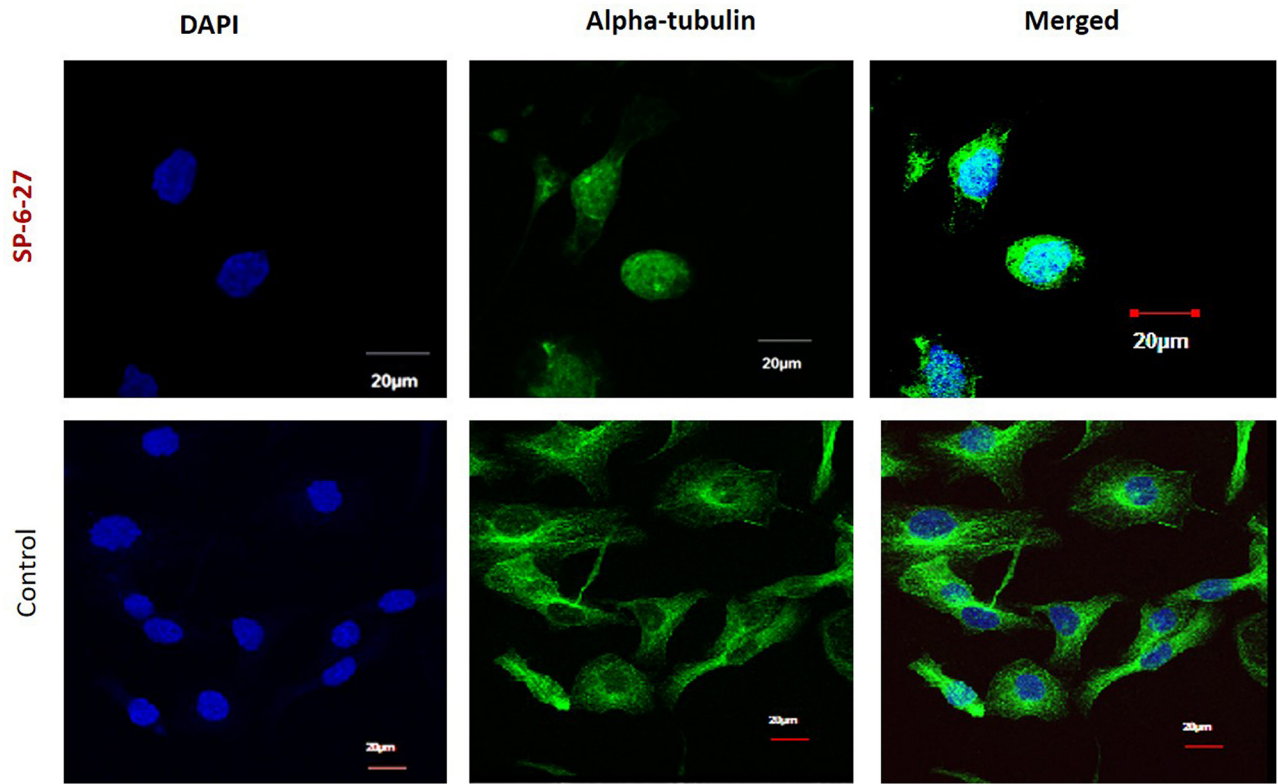

Supplementary Figure 2: Chromene analog SP-6-27 disrupts alpha-tubulin dynamics in ovarian cancer as determined by confocal microscopy analysis.

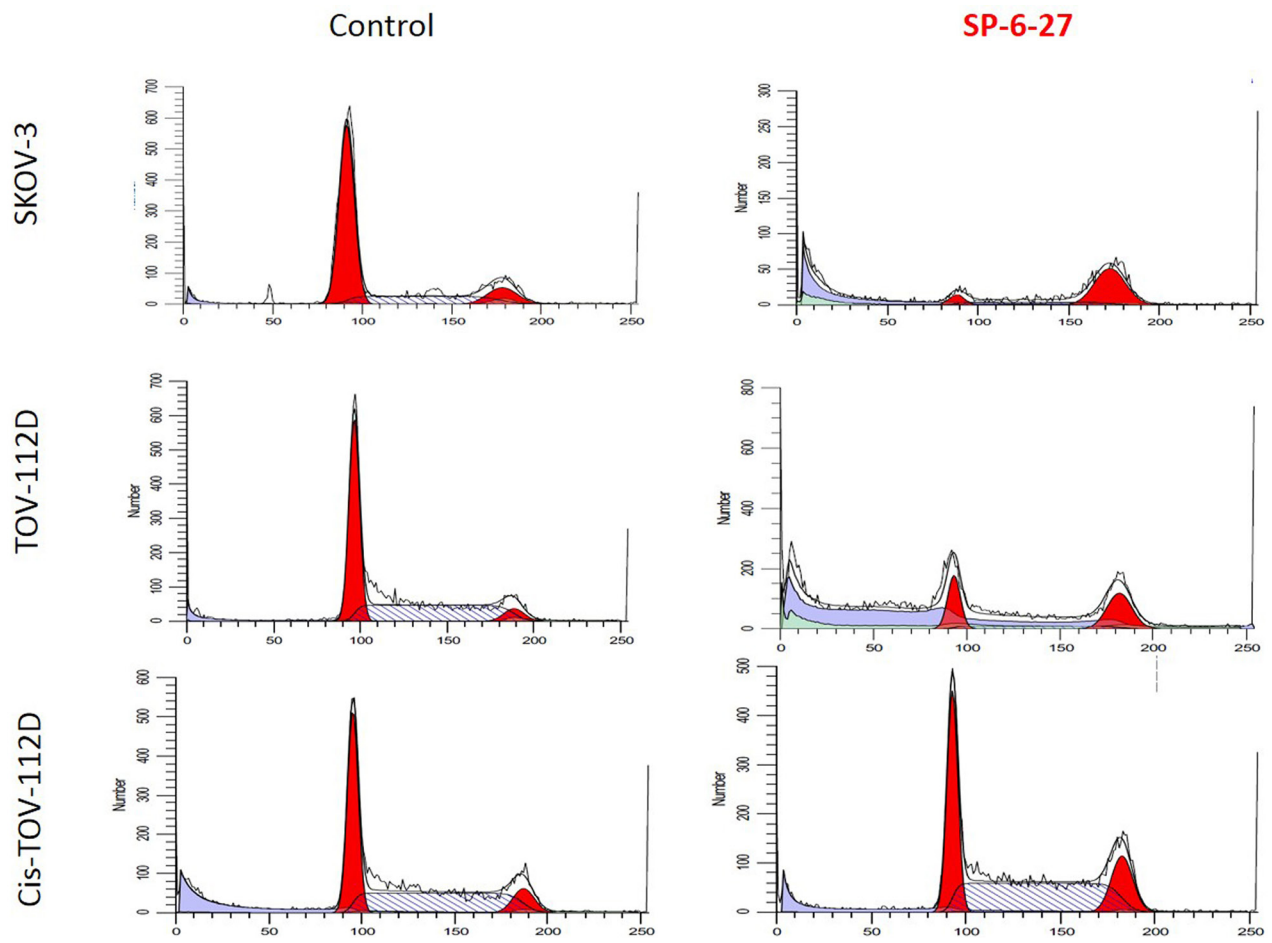

Supplementary Figure 3: Ovarian cancer cells arrest in G2-M phase upon SP-6-27 treatment.

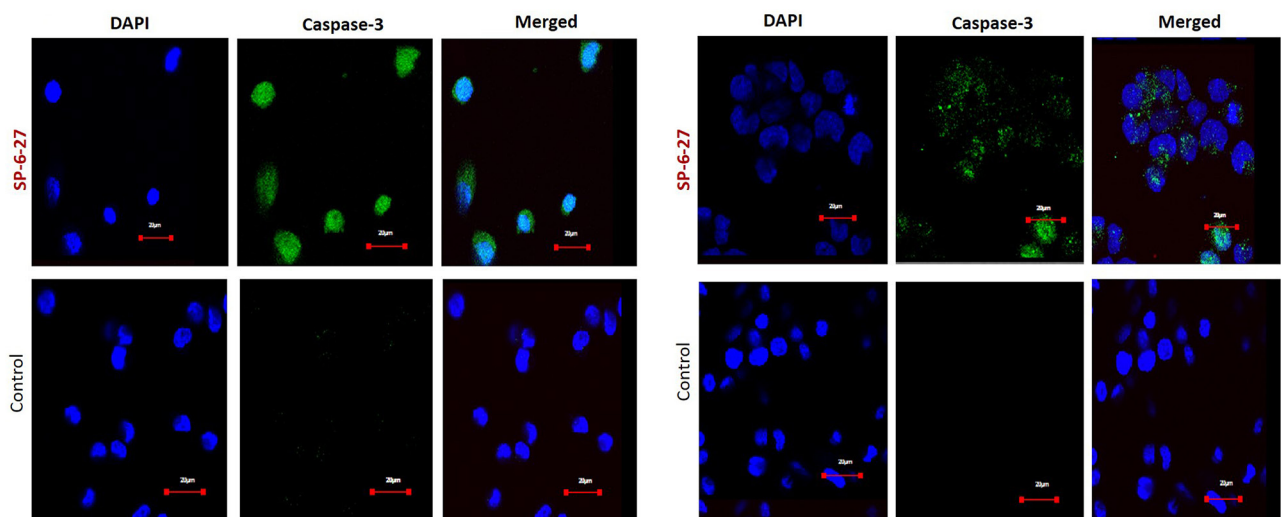

Supplementary Figure 4: Enhanced expression of cleaved-active caspase-3 in ovarian cancer cells following SP-6-27 treatment as determined by confocal microscopy analysis.

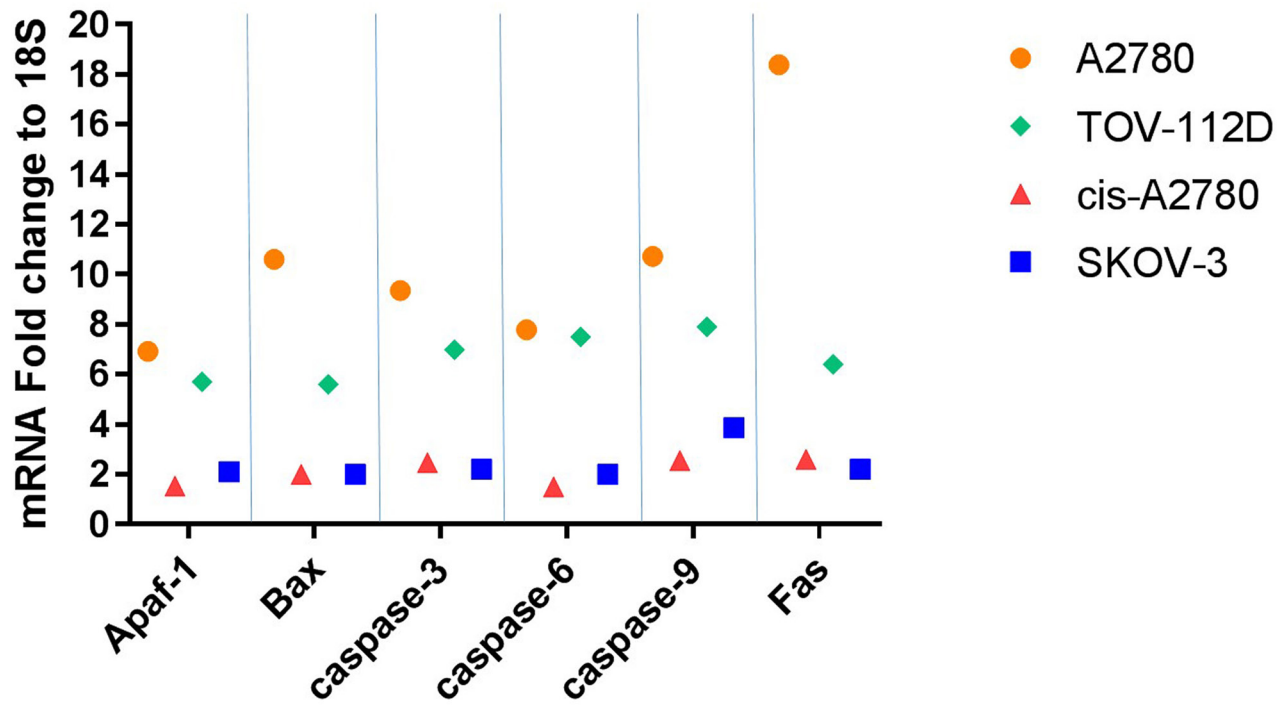

Supplementary Figure 5: Q-RT-PCR validation of upregulated cell death pathway array genes in different ovarian cancer cell lines.
